# Supplementary material
Source: MDPI journal article supplement (https://www.mdpi.com/search?q=ijerph-16-03489)
Supplement: s001 [file ijerph-16-03489-s001.pdf]

# Supplementary Material

**Table 1.** Recovery results of the CRMs in method quality control.

| Compound | Given Confidence Interval (mg kg <sup>-1</sup> ) |             | Determined Values (mg kg <sup>-1</sup> ) |              |
|----------|--------------------------------------------------|-------------|------------------------------------------|--------------|
|          | CRM 136-100                                      | CRM 119-100 | CRM 136-100                              | CRM 119-100  |
| DBP      | 0.64 - 0.80                                      | Not exist   | 0.73 ± 0.08                              | Not detected |
| DEHP     | 0.82 - 0.96                                      | 7.65 - 9.94 | 0.92 ± 0.11                              | 9.38 ± 0.17  |

**Table 2.** Correlations between detected OTUs and environmental parameters assessed by Mantel test.

| Parameter     | Mantel Statistic <i>r</i> | Significance |
|---------------|---------------------------|--------------|
| DBP           | -0.122                    | 0.893        |
| DEHP          | -0.03643                  | 0.528        |
| SOM           | 0.08358                   | 0.042        |
| Water content | 0.1426                    | 0.136        |
| pH            | 0.1426                    | 0.133        |
